# Supplementary material for: C2238/αANP modulates apolipoprotein E through Egr-1/miR199a in vascular smooth muscle cells in vitro
Source: PubMed Central journal article supplement (PMC4720902; doi:10.1038/cddis.2015.370), 2015-12-31

## SUPPLEMENTARY INFORMATION

### **C2238/ $\alpha$ ANP modulates Apolipoprotein E through Egr-1/miR199a in vascular smooth muscle cells in vitro**

Rosita Stanzione<sup>1\*</sup>, Sebastiano Sciarretta<sup>1,2\*</sup>, Simona Marchitti<sup>1</sup>, Franca Bianchi<sup>1</sup>, Sara Di Castro<sup>1</sup>,  
Stefania Scarpino<sup>3</sup>, Maria Cotugno<sup>1</sup>, Giacomo Frati<sup>1,2</sup>, Massimo Volpe<sup>1,3</sup>, Speranza Rubattu<sup>1,3</sup>

<sup>1</sup>IRCCS Neuromed, Pozzilli; <sup>2</sup>Department of Medical-Surgical Sciences and Biotechnologies, Sapienza University of Rome, Latina; <sup>3</sup>Department of Clinical and Molecular Medicine, School of Medicine and Psychology, Sapienza University of Rome, Ospedale S. Andrea, Rome; Italy

\*these authors contributed equally to this work

Running title: C2238/ $\alpha$ ANP and Apolipoprotein E

Correspondence to:

Speranza Rubattu, MD.  
Clinical and Molecular Medicine Department,  
School of Medicine and Psychology  
Sapienza University, S.Andrea Hospital, Rome;  
IRCCS Neuromed, Pozzilli (Is), Italy  
e-mail: [rubattu.speranza@neuromed.it](mailto:rubattu.speranza@neuromed.it)  
Tel. 0039 06 33775979; Fax 0039 06 33775061

## Supplementary Figure legends

### Supplementary Figure 1

#### *Role of oxidative stress on Egr-1 stimulation by CC2238/ $\alpha$ ANP*

Cells exposed to CC2238/ $\alpha$ ANP showed significant increase of Egr-1 expression levels, which was abolished in the presence of apocynin. Number of independent experiments=3.

CC2238/ $\alpha$ ANP = variant  $\alpha$ ANP; Egr-1= early growth response protein-1; CTR= control

### Supplementary Figure 2

#### *Modulation of proteins involved in apoptosis, necrosis and inflammation by CC2238/ $\alpha$ ANP in HUVMSCs*

Panels A-F. Representative western blots of cleaved-caspase-3, CREG, JNK, p38MAPK, Nf-kBp65, Smad4 under CC2238/ $\alpha$ ANP both in the presence and in the absence of NPR-C. Corresponding densitometric analysis is shown below each blot.

Data are expressed as mean  $\pm$  SD. Number of independent experiments=6.

\*\*  $p < 0.0001$  for CC2238/ $\alpha$ ANP vs all other points.

CC2238/ $\alpha$ ANP = variant  $\alpha$ ANP; siRNA1=NPRC gene silencer 1; siRNA2=NPRC gene silencer 2; CREG=cellular repressor of E1A-stimulated gene; JNK=c-Jun N-terminal kinase; CTR=control.

### Supplementary Figure 3

#### *Modulation of proteins involved in apoptosis, necrosis and inflammation by CC2238/ $\alpha$ ANP in CAMSCs*

Panels A-F. Representative western blots of cleaved-caspase-3, CREG, JNK, MAPKp38, Nf-kB, Smad4 under CC2238/ $\alpha$ ANP both in the presence and in the absence of NPR-C. Corresponding densitometric analysis is shown below each blot.

Data are expressed as mean  $\pm$  SD. Number of independent experiments=6.

\*\* p<0.0001 for CC2238/ $\alpha$ ANP vs all other points.

CC2238/ $\alpha$ ANP = variant  $\alpha$ ANP; siRNA1=NPRC gene silencer 1; siRNA2=NPRC gene silencer 2;

CREG=cellular repressor of E1A-stimulated gene; JNK=c-Jun N-terminal kinase; CTR= control.

#### **Supplementary Figure 4**

Results of ApoE gene sequencing in both HUVSMCs (panel A) and CASMCs (panel B).

HUVSMCs express both ApoE2 (Cys112/Cys158) and ApoE3 (Cys112/Arg158) isoforms.

CASMCs express both ApoE3 (Cys112/Arg158) and ApoE4 (Arg112/Arg158) isoforms.

Cys=cysteine; Arg=arginine

Supplementary Figure 1

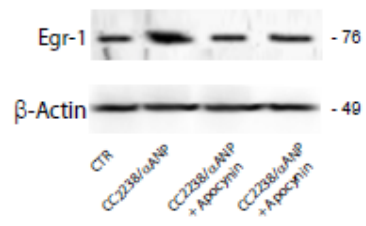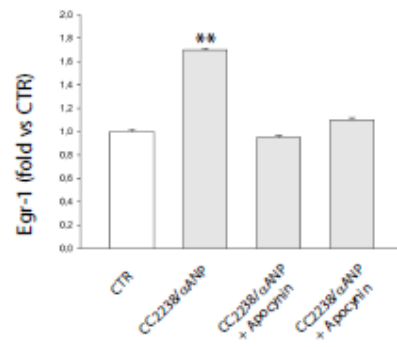

Supplementary Figure 2

A

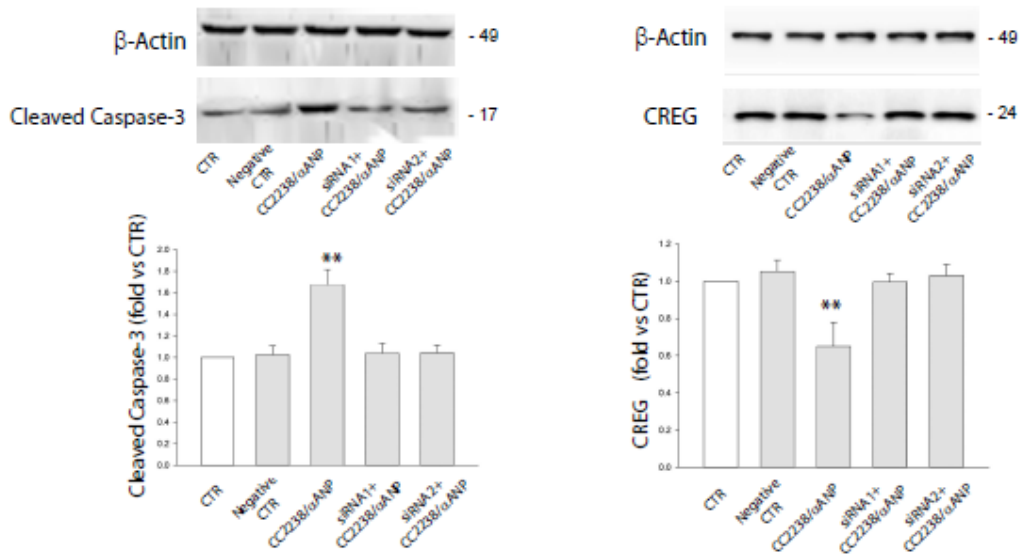

C

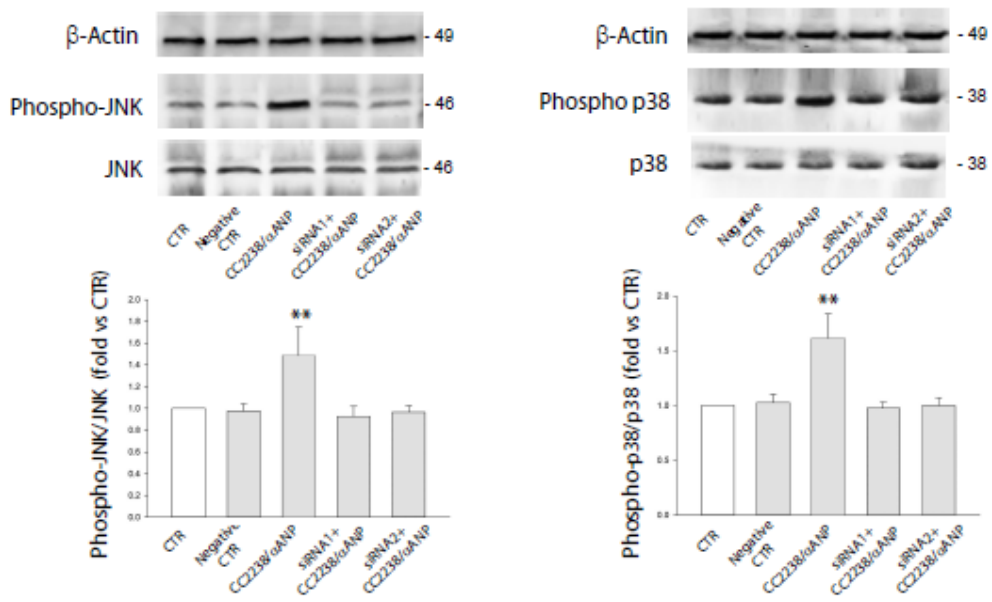

E

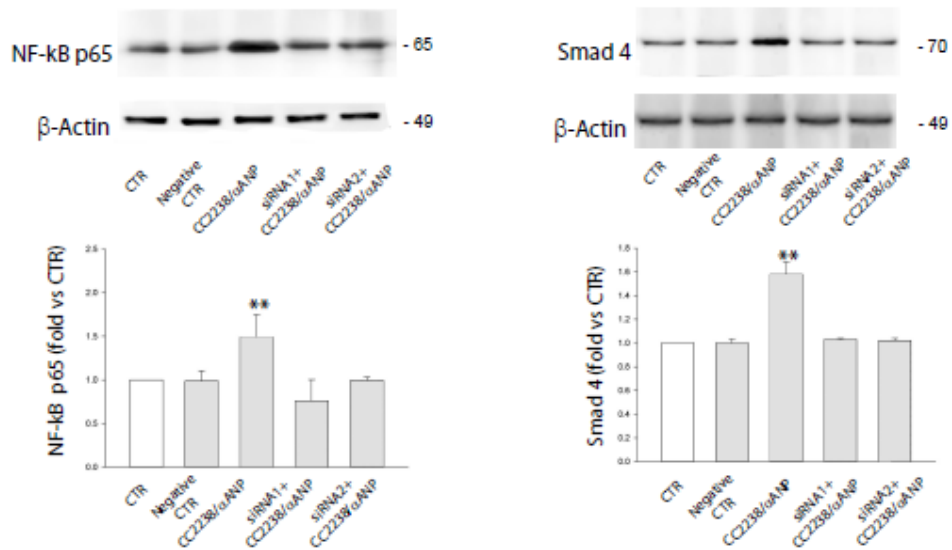

Supplementary Figure 3

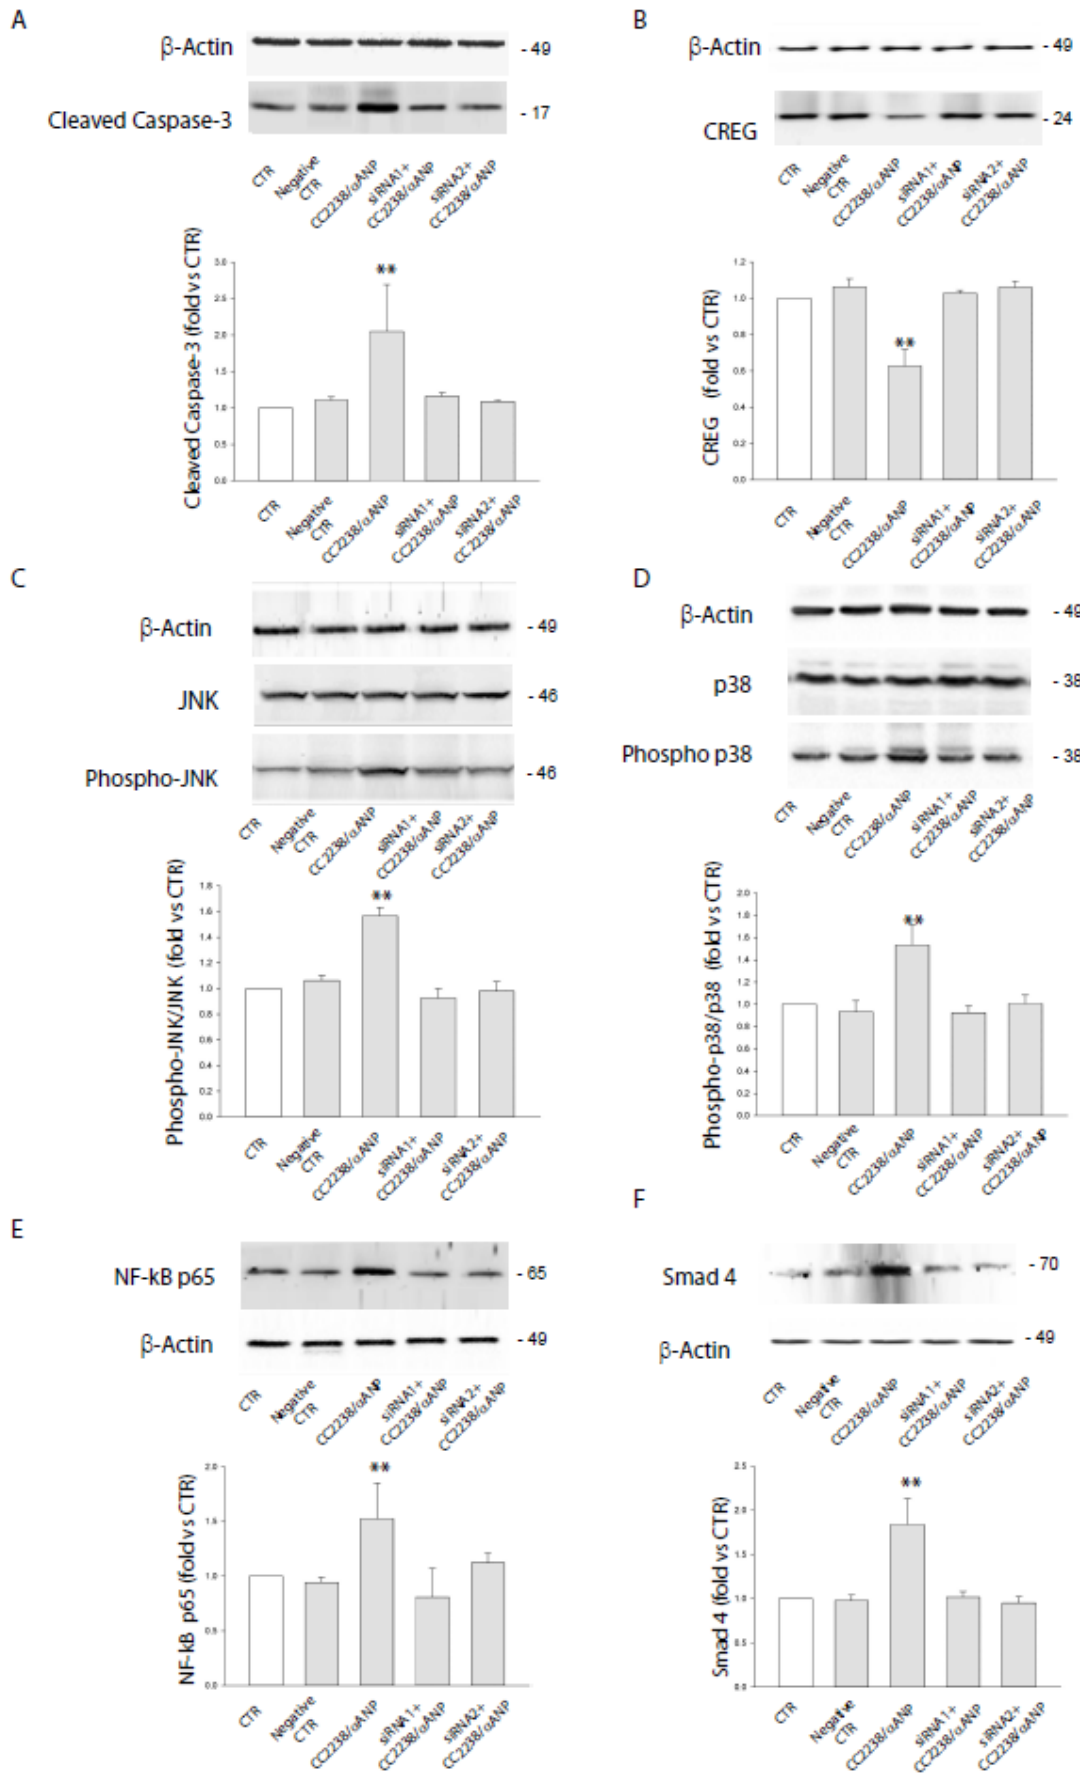

# Supplementary Figure 4

A

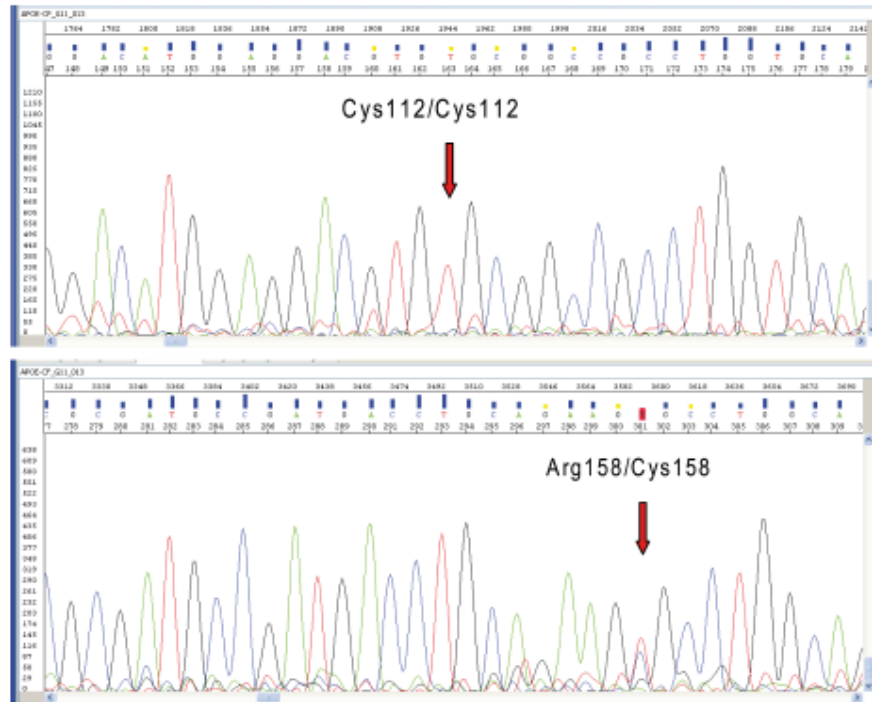

B

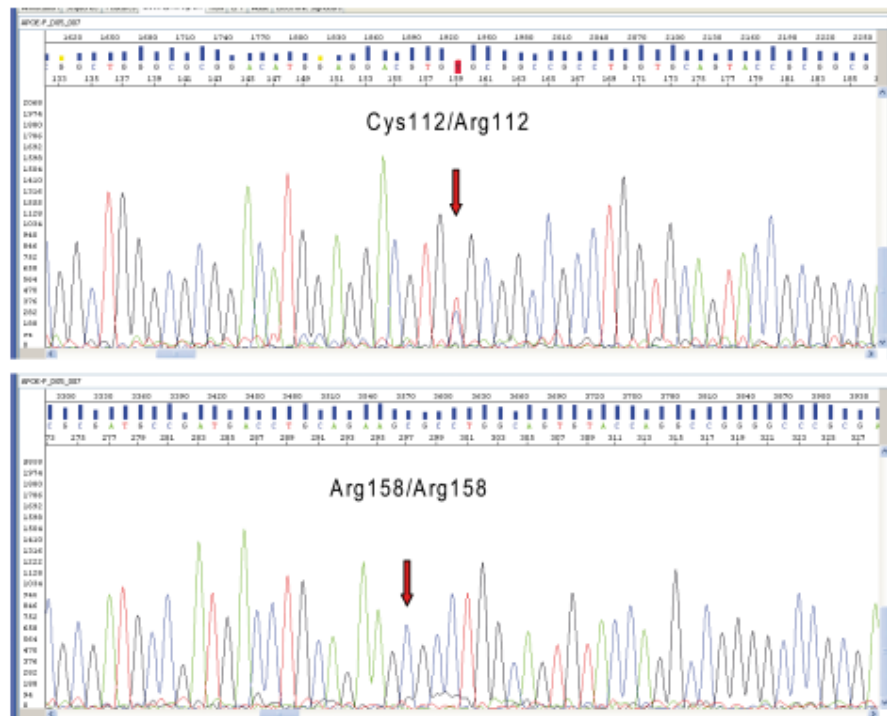

Supplement: cddis2015370x1.pdf [file cddis2015370x1.pdf]
